# Supplementary material
Source: MDPI journal article supplement (https://www.mdpi.com/2571-9408/6/3/151)
Supplement: s1 [file s1]

Table S1: Code, name and definition of the landmarks in this study. <sup>1</sup>From White, Black and Folkens, 2012, unless otherwise noted.

| Code    | Name                             | Definition <sup>1</sup>                                                                                                    |
|---------|----------------------------------|----------------------------------------------------------------------------------------------------------------------------|
| BM2_L/R | Left/right buccal M <sup>2</sup> | Left most buccal point in the upper second molar alveolus (cervical) margin (Stelzer et al., 2019)                         |
| BM1_L/R | Left/right buccal M <sup>1</sup> | Left most buccal point in the upper first molar alveolus (cervical) margin (Stelzer et al., 2019)                          |
| BP4_L/R | Left/right buccal P <sup>4</sup> | Left most buccal point in the upper second premolar alveolus (cervical) margin (Stelzer et al., 2019)                      |
| BP3_L/R | Left/right buccal P <sup>3</sup> | Left most buccal point in the upper first premolar alveolus (cervical) margin (Stelzer et al., 2019)                       |
| BCA_L/R | Left/right buccal C              | Left most buccal point on the upper canine alveolus (cervical) margin (Stelzer et al., 2019)                               |
| LM1_L/R | Left lingual M <sup>1</sup>      | Left most lingual point in the upper first molar alveolus (cervical) margin (Stelzer et al., 2019)                         |
| LP4_L/R | Left lingual P <sup>4</sup>      | Left most lingual point in the upper second premolar alveolus (cervical) margin (Stelzer et al., 2019)                     |
| LP3_L/R | Left lingual P <sup>3</sup>      | Left most lingual point in the upper first premolar alveolus (cervical) margin (Stelzer et al., 2019)                      |
| LCA_L/R | Left/right lingual C             | Left most lingual point on the upper canine alveolus (cervical) margin (Stelzer et al., 2019)                              |
| ALA L/R | Left/right alare                 | Most lateral points along the margin of the nasal aperture                                                                 |
| CGO L/R | Left/right zygoorbitale          | Points of intersection between the zygomatico-maxillary suture and the lower orbital rim                                   |
| MSO_L   | Mid-torus inferior               | Point in the middle of the inferior margin of the left supraorbital torus (McNulty, 2005)                                  |
| MXF L/R | Left/right maxillofrontale       | Points of intersection of the axis of the anterior lacrimal crest and the fronto-maxillary suture                          |
| NAS     | Nasion                           | Intersection between the internasal and fronto-nasal sutures                                                               |
| FMO_L   | Left frontomolare orbitale       | Intersection of the left lateral orbital rim and the frontozygomatic suture                                                |
| FMT_L   | Left frontomolare temporale      | Intersection of the left temporal line and the fronto-zygomatic suture                                                     |
| FRT_L/R | Left/right frontotemporale       | Most antero-medial point on the left/right temporal line                                                                   |
| SPH_L/R | Left/right sphenion              | Point of intersection between the parieto-sphenoidal, parieto-temporal, and sphenotemporal sutures (Martin & Saller, 1957) |

|         |                                          |                                                                                                                                                                |
|---------|------------------------------------------|----------------------------------------------------------------------------------------------------------------------------------------------------------------|
| FIS_L/R | Left/right superior infra-temporal fossa | Bilateral point where the infra-temporal crest is intersected by the spheno-squamosal suture (Smith et al., 2013)                                              |
| POR_L/R | Left/right porion                        | Upper- and outermost point on the margin of the external acoustic meatus                                                                                       |
| AST_L/R | Left/right asterion                      | Points of intersection between the lambdoid, parieto-mastoid and occipitomastoid sutures                                                                       |
| LAM     | Lambda                                   | Intersection of the sagittal and lambdoid sutures                                                                                                              |
| INI     | Inion                                    | Midline point projected where the superior nuchal lines meet                                                                                                   |
| PGL_L/R | Left/right posterior glenoid point       | Inferior-most point of the post-glenoid process (Smith et al., 2013)                                                                                           |
| LGL_L/R | Left/right lateral glenoid point         | Point on the lateral margin of the articular surface of the temporo-mandibular joint (point of inflection of the braincase) (modified from Smith et al., 2013) |
| AGP_L/R | Left/right anterior glenoid point        | Anterior-most point in the articular surface of the temporomandibular joint (Smith et al., 2013)                                                               |
| OPI     | Opisthion                                | Midline point on the posterior margin of the foramen magnum                                                                                                    |
| BAS     | Basion                                   | Midline point on the anterior margin of the foramen magnum                                                                                                     |
| PRO     | Prosthion                                | Most anterior point along the midline of the alveolar process                                                                                                  |
| GLA     | Glabella                                 | Anterior-most point along the midline of the frontal bone                                                                                                      |

Table S2: Descriptive statistics of surface semilandmarks test results. Mean and standard deviation of mean Euclidean distance between corresponding landmark coordinates estimated with and without using surface semilandmark information per couple of aligned fragments.

| <b>Fragments</b>                 | <b>Semilandmarks</b> | <b>Variable</b>     | <b>n</b> | <b>Mean</b> | <b>SD</b> |
|----------------------------------|----------------------|---------------------|----------|-------------|-----------|
| Facial skeleton – Neurocranium   | no                   | Procrustes distance | 21       | 0.454       | 0.194     |
| Facial skeleton – Neurocranium   | yes                  | Procrustes distance | 21       | 0.492       | 0.213     |
| Left supraorbital – Neurocranium | no                   | Procrustes distance | 21       | 0.29        | 0.124     |
| Left supraorbital – Neurocranium | yes                  | Procrustes distance | 21       | 0.288       | 0.084     |

Table S3: Shapiro-Wilk test of normality on model residuals of surface semilandmarks test results. Shapiro-Wilk statistic and p value for model residuals of mean Euclidean distance between corresponding landmark coordinates estimated with and without using surface semilandmark information per couple of aligned fragments.

| Variable        | Statistic | p value             |
|-----------------|-----------|---------------------|
| Model residuals | 0.961     | 0.0126 <sup>1</sup> |

<sup>1</sup> Not normal.

Table S4: Shapiro-Wilk test of normality on surface semilandmarks test results. Shapiro-Wilk statistic and p value for the mean Euclidean distance between corresponding landmark coordinates estimated with and without using surface semilandmark information per couple of aligned fragments.

| Fragments                        | Semilandmarks | Variable            | Statistic value | p                    |
|----------------------------------|---------------|---------------------|-----------------|----------------------|
| Facial skeleton – Neurocranium   | no            | Procrustes distance | 0.934           | 0.162                |
| Facial skeleton – Neurocranium   | yes           | Procrustes distance | 0.937           | 0.188                |
| Left supraorbital – Neurocranium | no            | Procrustes distance | 0.895           | 0.0281 <sup>1</sup>  |
| Left supraorbital – Neurocranium | yes           | Procrustes distance | 0.831           | 0.00205 <sup>1</sup> |

<sup>1</sup> Not normal.

Table S5: Levene test for the equality of variances on surface semilandmarks test results. Levene statistic and p value for the mean Euclidean distance between corresponding landmark coordinates estimated with and without using surface semilandmark information per couple of aligned fragments.

| df <sub>1</sub> | df <sub>2</sub> | Statistic | p value               |
|-----------------|-----------------|-----------|-----------------------|
| 3               | 80              | 6.37      | 0.000629 <sup>1</sup> |

<sup>1</sup> Not homoscedastic.

Table S6: Shapiro-Wilk test of normality on model residuals of transformed data of surface semilandmarks test results. Shapiro-Wilk statistic and p value for model residuals of Box-Cox transformed mean Euclidean distance between corresponding landmark coordinates estimated with and without using surface semilandmark information per couple of aligned fragments.

| Variable        | Statistic | p value |
|-----------------|-----------|---------|
| Model residuals | 0.979     | 0.180   |

Table S7: Shapiro-Wilk test of normality on transformed data of surface semilandmarks test results:" Shapiro-Wilk statistic and p value for for the Box-Cox transformed mean Euclidean distance between corresponding landmark coordinates estimated with and without using surface semilandmark information per couple of aligned fragments.

| <b>Fragments</b>                 | <b>Semilandmarks</b> | <b>Variable</b>     | <b>Statistic</b> | <b>p value</b>       |
|----------------------------------|----------------------|---------------------|------------------|----------------------|
| Facial skeleton – Neurocranium   | no                   | Procrustes distance | 0.928            | 0.128                |
| Facial skeleton – Neurocranium   | yes                  | Procrustes distance | 0.963            | 0.572                |
| Left supraorbital – Neurocranium | no                   | Procrustes distance | 0.966            | 0.641                |
| Left supraorbital – Neurocranium | yes                  | Procrustes distance | 0.831            | 0.00207 <sup>1</sup> |

<sup>1</sup> Not normal.

Table S8: Levene test for the equality of variances on transformed data of surface semilandmarks test results. Levene statistic and p value for the Box-Cox transformed mean Euclidean distance between corresponding landmark coordinates estimated with and without using surface semilandmark information per couple of aligned fragments.

| <b>df<sub>1</sub></b> | <b>df<sub>2</sub></b> | <b>Statistic</b> | <b>p value</b> |
|-----------------------|-----------------------|------------------|----------------|
| 3                     | 80                    | 2.02             | 0.118          |

Table S9: Descriptive statistics of surface semilandmarks vs symmetrization test results. Mean and standard deviation of mean Euclidean distance between corresponding landmark coordinates estimated with and without using surface semilandmark information and with and without symmetrization for the facial skeleton fragment.

| <b>Semilandmarks</b> | <b>Symmetry</b> | <b>Variable</b>     | <b>n</b> | <b>Mean</b> | <b>SD</b> |
|----------------------|-----------------|---------------------|----------|-------------|-----------|
| no                   | no              | Procrustes distance | 21       | 0.454       | 0.194     |
| no                   | yes             | Procrustes distance | 21       | 0.452       | 0.192     |
| yes                  | no              | Procrustes distance | 21       | 0.523       | 0.214     |
| yes                  | yes             | Procrustes distance | 21       | 0.61        | 0.248     |

Table S10: Shapiro-Wilk test of normality on model residuals of surface semilandmarks vs symmetrization test results. Shapiro-Wilk statistic and p value for model residuals of mean Euclidean distance between corresponding landmark coordinates estimated with and without using surface semilandmark information and with and without symmetrization for the facial skeleton fragment.

| <b>Variable</b> | <b>Statistic</b> | <b>p value</b> |
|-----------------|------------------|----------------|
| Model residuals | 0.971            | 0.0587         |

Table S11: Shapiro-Wilk test of normality on surface semilandmarks versus symmetrization test results. Shapiro-Wilk statistic and p value for the mean Euclidean distance between corresponding landmark coordinates estimated with and without using surface semilandmark information and with and without symmetrization for the facial skeleton fragment.

| <b>Semilandmarks</b> | <b>Symmetry</b> | <b>Variable</b>     | <b>Statistic</b> | <b>p value</b> |
|----------------------|-----------------|---------------------|------------------|----------------|
| no                   | no              | Procrustes distance | 0.934            | 0.162          |
| no                   | yes             | Procrustes distance | 0.934            | 0.165          |
| yes                  | no              | Procrustes distance | 0.962            | 0.553          |
| yes                  | yes             | Procrustes distance | 0.941            | 0.230          |

Table S12: Levene test for the equality of variances on surface semilandmarks versus symmetrization test results. Levene statistic and p value for the mean Euclidean distance between corresponding landmark coordinates estimated with and without using surface semilandmark information and with and without symmetrization for the facial skeleton fragment.

| <b>df<sub>1</sub></b> | <b>df<sub>2</sub></b> | <b>Statistic</b> | <b>p value</b> |
|-----------------------|-----------------------|------------------|----------------|
| 3                     | 80                    | 0.206            | 0.892          |
